# Supplementary material for: Impacts of detritivore diversity loss on instream decomposition are greatest in the tropics
Source: PubMed Central journal article supplement (PMC8211652; doi:10.1038/s41467-021-23930-2), 2021-06-17
Supplement: 41467_2021_23930_MOESM1_ESM.pdf [file 41467_2021_23930_MOESM1_ESM.pdf]

# Impacts of detritivore diversity loss on instream decomposition are greatest in the tropics

by Luz Boyero et al.

## Supplementary Information

### Supplementary Tables

**Supplementary Table 1.** Summary of model selection procedure for the set of models used to examine the influence of detritivore diversity (D), abundance (A), biomass (B) and mean body size (S), latitude (L), and the interactions between the detritivore variables and latitude, on total or detritivore-mediated decomposition, based on Akaike weights ( $w_i$ ). Only the 10 best models (out of > 500 fitted models) are shown, including the factors and interactions included in each model (+), the degrees of freedom (df), delta AICc ( $\Delta_i$ ; difference in AICc value relative to the best model) and Akaike weights ( $w_i$ ; probability that a model is the best among the whole set of models). Models are ordered from the best to the poorest fit based on  $w_i$ .

| Model #                                   | Factors and interactions included in the model |   |   |   |   |     |     |     |     | df | AICc    | $\Delta_i$ | $w_i$ |
|-------------------------------------------|------------------------------------------------|---|---|---|---|-----|-----|-----|-----|----|---------|------------|-------|
|                                           | D                                              | A | B | S | L | DxL | AxL | BxL | SxL |    |         |            |       |
| <b>Total decomposition</b>                |                                                |   |   |   |   |     |     |     |     |    |         |            |       |
| 1                                         | +                                              | + | + | + |   | +   | +   | +   |     | 34 | -2530.1 | 0.00       | 0.245 |
| 2                                         | +                                              | + | + | + | + | +   | +   | +   |     | 36 | -2529.7 | 0.43       | 0.198 |
| 3                                         | +                                              | + |   |   | + | +   | +   | +   |     | 33 | -2529.5 | 0.60       | 0.182 |
| 4                                         | +                                              | + |   | + |   | +   | +   | +   |     | 33 | -2527.9 | 2.22       | 0.081 |
| 5                                         | +                                              |   |   | + | + | +   | +   | +   | +   | 32 | -2527.0 | 3.15       | 0.051 |
| 6                                         | +                                              | + |   |   | + | +   | +   | +   | +   | 31 | -2526.3 | 3.89       | 0.035 |
| 7                                         | +                                              | + |   | + | + | +   | +   | +   | +   | 32 | -2526.2 | 3.98       | 0.033 |
| 8                                         | +                                              |   |   |   | + | +   | +   | +   | +   | 31 | -2525.7 | 4.40       | 0.027 |
| 9                                         | +                                              | + |   | + |   | +   | +   | +   | +   | 35 | -2525.0 | 5.14       | 0.019 |
| 10                                        | +                                              |   |   | + | + |     | +   | +   | +   | 31 | -2524.0 | 6.18       | 0.011 |
| <b>Detritivore-mediated decomposition</b> |                                                |   |   |   |   |     |     |     |     |    |         |            |       |
| 1                                         | +                                              | + |   |   |   | +   |     | +   |     | 30 | -2470.1 | 0.00       | 0.158 |
| 2                                         | +                                              | + |   | + |   | +   |     | +   |     | 31 | -2469.2 | 0.93       | 0.100 |
| 3                                         |                                                | + |   |   |   | +   | +   | +   |     | 32 | -2468.8 | 1.32       | 0.082 |
| 4                                         | +                                              |   |   |   |   | +   | +   | +   |     | 33 | -2468.4 | 1.77       | 0.065 |
| 5                                         | +                                              | + | + |   |   | +   |     | +   |     | 31 | -2468.1 | 2.01       | 0.058 |
| 6                                         |                                                |   |   |   |   | +   | +   | +   |     | 33 | -2468.0 | 2.15       | 0.054 |
| 7                                         |                                                |   |   |   | + | +   | +   | +   |     | 33 | -2467.3 | 2.87       | 0.038 |
| 8                                         |                                                |   | + |   |   | +   | +   | +   |     | 34 | -2467.0 | 3.15       | 0.033 |
| 9                                         |                                                | + |   | + |   | +   |     | +   | +   | 32 | -2466.8 | 3.35       | 0.030 |
| 10                                        |                                                | + | + |   |   | +   | +   | +   |     | 33 | -2466.5 | 3.61       | 0.026 |

**Supplementary Table 2.** Results of generalized additive models exploring significant interactions between detritivore variables (see Table 1) and latitude as categorical predictor (tropical,  $\leq 23^\circ$ ; temperate, 24-60°; polar,  $> 60^\circ$ ) to total and detritivore-mediated litter decomposition. We show effective degrees of freedom (edf) and values of  $F$  and  $P$  for each factor.

| <b>Effect</b>                             | <b>edf</b> | <b><math>F</math></b> | <b><math>P</math></b> |
|-------------------------------------------|------------|-----------------------|-----------------------|
| <b>Total decomposition</b>                |            |                       |                       |
| Diversity, tropical                       | 3.08       | 10.66                 | <0.001                |
| Diversity, temperate                      | 1.67       | 6.71                  | 0.001                 |
| Diversity, polar                          | 1.00       | 0.09                  | 0.765                 |
| Abundance, tropical                       | 1.00       | 0.35                  | 0.553                 |
| Abundance, temperate                      | 4.00       | 4.25                  | <0.001                |
| Abundance, polar                          | 1.00       | 2.14                  | 0.146                 |
| Biomass, tropical                         | 1.00       | 0.50                  | 0.482                 |
| Biomass, temperate                        | 3.27       | 4.95                  | <0.001                |
| Biomass, polar                            | 1.00       | 5.04                  | 0.026                 |
| <b>Detritivore-mediated decomposition</b> |            |                       |                       |
| Diversity, tropical                       | 2.63       | 3.96                  | 0.008                 |
| Diversity, temperate                      | 3.08       | 2.46                  | 0.054                 |
| Diversity, polar                          | 1.00       | 0.59                  | 0.444                 |
| Abundance, tropical                       | 1.00       | 1.35                  | 0.247                 |
| Abundance, temperate                      | 8.13       | 21.68                 | <0.001                |
| Abundance, polar                          | 1.00       | 4.36                  | 0.038                 |
| Biomass, tropical                         | 3.42       | 4.47                  | 0.515                 |
| Biomass, temperate                        | 1.00       | 22.10                 | 0.002                 |
| Biomass, polar                            | 1.00       | 22.10                 | <0.001                |

**Supplementary Table 3.** Families of detritivores with predominantly Laurasian, Gondwanan or global distribution, and total number of individuals (N) found in this study. Note that some families (Baetidae, Chironomidae and Leptophlebiidae) have few litter-feeding detritivores; here we refer to the distribution of litter-feeding detritivore taxa within these families, rather than to whole families.

| <b>Laurasian distribution</b> |      | <b>Gondwanan distribution</b> |     | <b>Global distribution</b> |      |
|-------------------------------|------|-------------------------------|-----|----------------------------|------|
| Family                        | N    | Family                        | N   | Family                     | N    |
| Nemouridae                    | 1167 | Calamoceratidae               | 412 | Lepidostomatidae           | 2101 |
| Gammaridae                    | 897  | Janiridae                     | 139 | Leptophlebiidae            | 880  |
| Leuctridae                    | 665  | Atyidae                       | 77  | Leptoceridae               | 358  |
| Asellidae                     | 326  | Elmidae                       | 32  | Chironomidae               | 232  |
| Capniidae                     | 290  | Perthiidae                    | 26  | Tipulidae                  | 133  |
| Sericostomatidae              | 207  | Crambidae                     | 20  | Baetidae                   | 45   |
| Taeniopterygidae              | 206  | Palaemonidae                  | 10  |                            |      |
| Calocidae                     | 180  | Potamonautidae                | 8   |                            |      |
| Psychodidae                   | 149  | Odontoceridae                 | 6   |                            |      |
| Limnephilidae                 | 141  | Hyaellidae                    | 4   |                            |      |
| Eusiridae                     | 114  | Helicophidae                  | 2   |                            |      |
| Chloroperlidae                | 106  | Pisuliidae                    | 2   |                            |      |
| Ephemerellidae                | 93   | Blaberidae                    | 1   |                            |      |
| Gripopterygidae               | 78   | Ptilodactylidae               | 1   |                            |      |
| Crangonyctidae                | 39   |                               |     |                            |      |
| Ephemeridae                   | 35   |                               |     |                            |      |
| Austroperlidae                | 26   |                               |     |                            |      |
| Scirtidae                     | 18   |                               |     |                            |      |
| Diamphipnoidae                | 16   |                               |     |                            |      |
| Limoniidae                    | 16   |                               |     |                            |      |
| Paramilitidae                 | 11   |                               |     |                            |      |
| Phryganeidae                  | 10   |                               |     |                            |      |
| Notonemouridae                | 6    |                               |     |                            |      |
| Brachycentridae               | 4    |                               |     |                            |      |
| Pteronarcyidae                | 3    |                               |     |                            |      |
| Tanyderidae                   | 2    |                               |     |                            |      |

**Supplementary Table 4.** Location of study sites [country, region, stream name, biome, decimal latitude (Lat) and longitude (Long) and altitude (degrees) and altitude (Alt; m asl)]; main climatic variables [mean annual temperature (MT, °C); annual precipitation (AP, mm); temperature seasonality (TS, standard deviation of monthly mean values x 100) and precipitation seasonality (PS, coefficient of variation of monthly mean values)]; and main physicochemical characteristics [stream average width (Wi; m); pH; nitrate-N (NO<sub>3</sub>; µg L<sup>-1</sup>) and phosphate-P (PO<sub>4</sub>; µg L<sup>-1</sup>)]. Sites are ordered by increasing absolute latitude. NP, National Park; NT, Northern Territory; QLD, Queensland; GA, Georgia; WA, Western Australia; IL, Illinois; MD, Maryland; NY, New York; MI, Michigan; MO, Montana BC, British Columbia. Biomes: TrS; tropical wet forest, TrWF; xeric shrubland, XeS (also termed desert, although aridity was low in riparian forests in our study regions); Mediterranean forest, MeF; temperate broadleaf forest, TeBF; temperate coniferous forest, TeCF; and tundra, Tu.

| Country       | Region                | Stream name       | Biome | Lat    | Long   | Alt  | MT   | AP   | TS   | PS  | Wi  | pH  | NO3    | PO4   |
|---------------|-----------------------|-------------------|-------|--------|--------|------|------|------|------|-----|-----|-----|--------|-------|
| Kenya         | Nakuru                | Njoro             | TrS   | -0.37  | 35.93  | 2263 | 15.8 | 954  | 72   | 43  | 4.4 | 8.1 | 2485.0 | 6.9   |
| Kenya         | Narok                 | Ngetunyek         | TrWF  | -0.71  | 35.46  | 2096 | 16.5 | 1043 | 74   | 48  | 2.3 | 7.4 | 319.0  | 11.5  |
| Brazil        | Amazonas              | Acará 23          | TrWF  | -2.95  | -59.96 | 58   | 27.2 | 2188 | 48   | 439 | 2.6 | 4.6 | 15.7   | 26.3  |
| Malaysia      | Kuala Lumpur          | Ampang            | TrWF  | 3.17   | 101.78 | 176  | 26.5 | 2502 | 37   | 27  | 1.6 | 7.4 | 600.0  | 5.0   |
| Brazil        | Rio Grande do Norte   | Pitimbu           | TrWF  | -5.92  | -35.18 | 50   | 25.8 | 1402 | 108  | 71  | 4.2 | 6.5 | 1050.0 | 1.4   |
| Panama        | Chiriquí              | Caldera           | TrWF  | 8.85   | -82.50 | 1825 | 15.9 | 2266 | 58   | 55  | 3.7 | 6.9 | 666.0  | 16.0  |
| Guinea        | Faranah               | Djigbè            | TrWF  | 9.16   | -10.56 | 549  | 24.2 | 2131 | 139  | 76  | 3.8 | 7.5 | 140.0  | 0.7   |
| India         | Tamil Nadu            | Thadaganachiamman | TrWF  | 10.09  | 77.25  | 740  | 19.3 | 2150 | 130  | 76  | 3.2 | 6.9 | 980.0  | 32.0  |
| Venezuela     | Yaracuy               | Herrera 1         | XeS   | 10.29  | -68.65 | 123  | 24.2 | 1253 | 45   | 55  | 4.3 | 8.3 | 1439.5 | 1.1   |
| Brazil        | Bahia                 | Morro Fervido     | XeS   | -12.99 | -41.34 | 950  | 20.3 | 940  | 130  | 63  | 0.8 | 3.9 | 9.1    | 54.8  |
| Australia     | Litchfield NP (NT)    | Shady             | TrS   | -13.10 | 130.78 | 111  | 26.9 | 1422 | 210  | 109 | 2.2 | 8.0 | 7.0    | 0.7   |
| Guatemala     | Laguna Lauchá NP      | Machacas          | TrWF  | 15.95  | -90.68 | 194  | 25.7 | 3147 | 148  | 62  | 3.6 | 6.5 | 53.8   | 2.7   |
| Puerto Rico   | El Yunque NP          | Prieta            | TrWF  | 18.31  | -65.75 | 350  | 22.1 | 2961 | 131  | 27  | 2.1 | 7.2 | 55.2   | 3.1   |
| Australia     | Paluma Range NP (QLD) | Birthday          | TrWF  | -18.98 | 146.16 | 820  | 20.2 | 2584 | 344  | 67  | 8.6 | 6.3 | 19.0   | 2.5   |
| Brazil        | Minas Gerais          | RCA52             | TrS   | -19.16 | -47.01 | 891  | 21.1 | 1545 | 169  | 84  | 4.9 | 6.6 | 12.1   | 0.7   |
| Australia     | Tamborine NP (QLD)    | Cedar             | TeBF  | -27.90 | 153.18 | 240  | 18.6 | 1325 | 373  | 41  | 5.7 | 6.9 | 706.0  | 3.0   |
| United States | Toombs (GA)           | 15 Mile           | TeCF  | 32.45  | -82.06 | 58   | 18.6 | 1198 | 685  | 23  | 7.9 | 7.2 | 96.8   | 140.8 |
| South Africa  | Western Cape          | Lourens           | Me    | -34.08 | 18.89  | 85   | 16.1 | 852  | 358  | 63  | 6.3 | 7.1 | 585.0  | 5.0   |
| Australia     | South West (WA)       | Warren            | Me    | -34.51 | 116.10 | 93   | 14.9 | 1131 | 332  | 69  | 8.7 | 7.8 | 6.3    | 0.7   |
| Japan         | Honshu                | Komori            | TeBF  | 35.83  | 138.53 | 1080 | 7.6  | 1653 | 880  | 53  | 6.0 | 7.5 | 585.0  | 7.2   |
| Chile         | Biobío                | Nonguén           | TeBF  | -36.88 | -72.99 | 95   | 11.2 | 1502 | 304  | 84  | 5.0 | 7.4 | 32.8   | 20.0  |
| Spain         | Sierra Nevada         | Alhama            | Me    | 37.20  | -3.25  | 1374 | 9.3  | 758  | 688  | 44  | 2.5 | 7.5 | 89.5   | 3.5   |
| United States | Balcom (IL)           | Big               | TeBF  | 37.42  | -89.17 | 123  | 13.6 | 1196 | 932  | 16  | 8.8 | 7.7 | 820.0  | 76.0  |
| Australia     | Victoria              | Keppel            | TeBF  | -37.45 | 145.76 | 415  | 10.8 | 1592 | 465  | 39  | 1.9 | 7.5 | 52.5   | 5.0   |
| Portugal      | Lousã (Coímbra)       | Cerdeira          | Me    | 40.09  | -8.20  | 531  | 12.5 | 1288 | 504  | 58  | 2.1 | 7.2 | 60.5   | 7.5   |
| Argentina     | Patagonia Andina      | Rojizo            | TeBF  | -41.23 | -71.30 | 1120 | 5.9  | 810  | 443  | 62  | 1.2 | 7.9 | 236.2  | 11.5  |
| United States | Ithaca (NY)           | Cascadilla        | TeBF  | 42.43  | -76.45 | 275  | 7.7  | 930  | 939  | 20  | 4.3 | 8.0 | 250.8  | 6.8   |
| United States | Macomb (MI)           | Stoney            | TeBF  | 42.79  | -83.09 | 258  | 8.7  | 792  | 1009 | 23  | 4.6 | 6.6 | 207.1  | 71.7  |
| Australia     | Tasmania              | Browns            | TeBF  | -42.92 | 147.25 | 430  | 10.5 | 969  | 318  | 18  | 3.1 | 7.4 | 3.3    | 6.0   |

| Country       | Region                | Stream name    | Biome | Lat   | Long    | Alt | MT   | AP   | TS   | PS | Wi  | pH  | NO3    | PO4  |
|---------------|-----------------------|----------------|-------|-------|---------|-----|------|------|------|----|-----|-----|--------|------|
| Japan         | Hokkaido              | Toyohira       | TeCF  | 42.93 | 141.16  | 450 | 5.4  | 1359 | 1009 | 23 | 3.7 | 7.1 | 919.4  | 0.7  |
| Spain         | Cordillera Cantábrica | Agüera         | TeBF  | 43.21 | -3.27   | 305 | 12.5 | 1081 | 436  | 28 | 2.3 | 7.2 | 675.0  | 1.7  |
| France        | Occitanie             | Peyreblanque   | TeBF  | 43.42 | 2.22    | 752 | 10.1 | 908  | 588  | 14 | 2.3 | 6.6 | 630.1  | 1.3  |
| United States | Flathead lake NP (MT) | Roy's          | TeCF  | 47.88 | -114.03 | 897 | 6.0  | 610  | 800  | 22 | 3.6 | 7.9 | 550.9  | 9.0  |
| Canada        | Vancouver Coast (BC)  | East           | TeCF  | 49.27 | -122.57 | 165 | 8.8  | 1717 | 573  | 52 | 2.0 | 6.6 | 675.5  | 2.2  |
| Poland        | Malopolska            | Krzyworzeka    | TeCF  | 49.86 | 20.12   | 266 | 7.9  | 728  | 799  | 47 | 7.9 | 8.3 | 1516.5 | 15.1 |
| Germany       | NS Ruppiner Land      | Kunster        | TeBF  | 53.02 | 12.75   | 62  | 8.4  | 575  | 688  | 24 | 2.7 | 7.5 | 240.1  | 17.5 |
| Sweden        | Uppsala               | Lafssjon       | TeBF  | 60.03 | 17.81   | 61  | 5.6  | 564  | 790  | 32 | 4.4 | 6.9 | 427.0  | 1.0  |
| Finland       | Finnish Lapland       | Garnjargajohka | Tu    | 69.93 | 27.14   | 75  | -0.8 | 425  | 824  | 43 | 2.8 | 7.1 | 3.3    | 0.7  |

**Supplementary Table 5.** Plant species used in the different litter mixtures and place of collection (country and decimal latitude and longitude in degrees).

| Mixture | Species                 | Country    | Lat   | Long   |
|---------|-------------------------|------------|-------|--------|
| I       | <i>Alnus acuminata</i>  | Ecuador    | -0.67 | -77.92 |
|         | <i>Alnus glutinosa</i>  | Spain      | 43.21 | -3.27  |
|         | <i>Alnus incana</i>     | Sweden     | 60.03 | 17.82  |
| II      | <i>Ficus insipida</i>   | Costa Rica | 10.43 | -84.01 |
|         | <i>Ficus natalensis</i> | Kenya      | -0.37 | 35.92  |
|         | <i>Ficus dulciaria</i>  | Ecuador    | -0.59 | -77.88 |
| III     | <i>Fagus sylvatica</i>  | France     | 43.42 | 2.19   |
|         | <i>Quercus prinus</i>   | USA        | 39.22 | -76.70 |
|         | <i>Castanea sativa</i>  | Portugal   | 41.18 | -8.35  |
| IV      | <i>A. acuminata</i>     |            |       |        |
|         | <i>F. insipida</i>      |            |       |        |
|         | <i>F. sylvatica</i>     |            |       |        |
| V       | <i>A. glutinosa</i>     |            |       |        |
|         | <i>F. natalensis</i>    |            |       |        |
|         | <i>Q. prinus</i>        |            |       |        |
| VI      | <i>A. incana</i>        |            |       |        |
|         | <i>F. dulciaria</i>     |            |       |        |
|         | <i>C. sativa</i>        |            |       |        |

## Supplementary Figures

**Supplementary Figure 1.** Box plot showing the median, interquartile range and minimum-maximum range of total decomposition (prop. litter mass loss) at the end of the experiment in each biome; n = 38 independent experiments. Tu, tundra; TeBF, temperate broadleaf forest; TeCF, temperate coniferous forest; MeF, Mediterranean forest; XeS, xeric shrubland; TrWF, tropical wet forest; and TrS, tropical savanna.

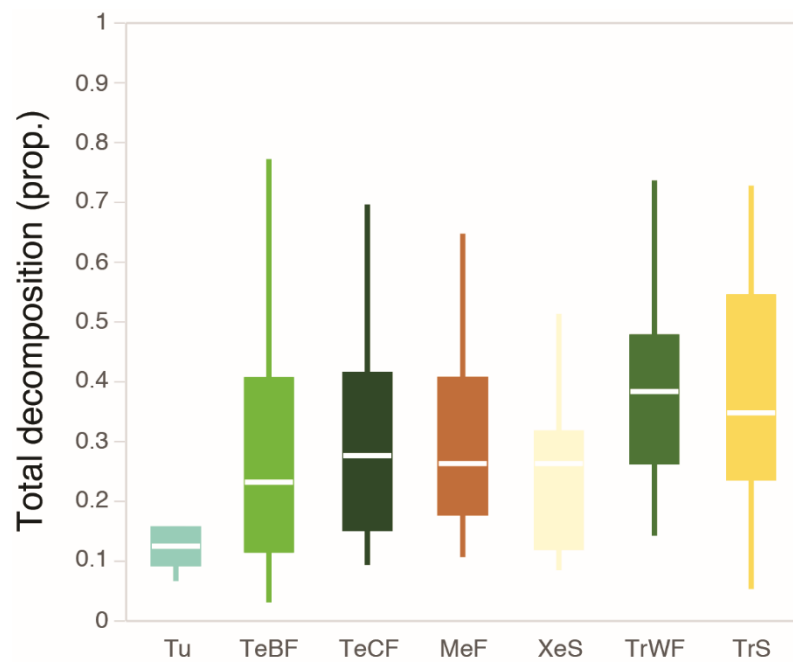

## Supplementary Notes

**Supplementary Note 1.** Funding sources used to conduct research in different regions.

**Argentina:** ANCYPT (PICT.2016-959). **Australia, Tasmania:** Australian Research Council Discovery Program (ARC- DP) DP190102837). **Brazil, Bahia:** Coordenação de Aperfeiçoamento de Pessoal de Nível Superior (CAPES ref. 88882.347849/2019-01); Conselho Nacional de Desenvolvimento Científico e Tecnológico (CNPq ref. 424661/2016-0). **Brazil, Manaus:** Programa de Apoio à Fixação de Doutores no Amazonas FIXAM/AM (Amazonas State Research Foundation, FAPEAM); Conselho Nacional de Desenvolvimento Científico e Tecnológico (CNPq; ref. 308970/2019-5); INCT ADAPTA II – CNPq (ref. 465540/2014-7); FAPEAM (ref. 062.1187/2017); CAPES–Coordination for the Improvement of Higher Education Personnel. **Brazil, Minas Gerais:** Programa Peixe-Vivo of Companhia Energética de Minas Gerais (CEMIG) and P&D Aneel-Cemig GT-599 and GT-611; Conselho Nacional de Desenvolvimento Científico e Tecnológico (303380/2015-2); Coordenação de Aperfeiçoamento de Pessoal de Nível Superior (CAPES) Finance Code 001. **Brazil, Rio Grande do Sul:** CNPq grant 305203/2017-7 and 421288/2017-5. **Chile:** ANID/FONDAP/15130015. **Canada:** Natural Sciences and Engineering Research Council of Canada. **Costa Rica** (litter collection and export): US National Science Foundation, grant DEB-1938843. **Finland:** Academy of Finland (grant no. 318230). **Guatemala:** Education for Nature Program from the World Wild Fund and LASPAU-Fulbright Program. **India:** Science and Engineering Research Board, New Delhi (ref. ECR/2016/000191/LS). **Japan, Sapporo:** Ministry of Land, Infrastructure, Transport, and Tourism of Japan; JSPS Grant-in-Aid for Scientific Research (B) (18H03407). **Kenya, Eldoret:** International Foundation for Science (Research Grant No. A/5810-1). **Panama:** National Secretariat for Science, Technology and Innovation (SENACYT; ref. APY-GC-2018B-052 contract no. 259-2018 and Scholarship contract no. 001-2015-AC); National Research System of Panama (SNI; contract no. 186-2018-AC); Scholarship IFARHU-SENACYT (contract no. 270-2018-1011-GG). **Portugal:** IATV and Portuguese Foundation for Science and Technology (FCT; strategic project UIDP/04292/2020 granted to MARE). **Spain, Almería:** 2014-2020 Operational Programme FEDER Andalusia, Spain (ref. UAL18-RNM-B006-B). **Spain, Basque Country:** Basque Government funds (ref. IT951-16); Spanish Ministry for Science, Innovation and Universities (ref. RTI2018-095023- B-I00). **Other regions:** funding was obtained from host institutions.
